# Supplementary material for: Administrative Data in Cardiovascular Research—A Comparison of Polish National Health Fund and CRAFT Registry Data
Source: MDPI journal article supplement (doi:10.3390/ijerph191911964), 2022-09-22
Supplement: s1 [file s1]

Supplementary Table S1. ICD-10 codes of clinical diagnoses analyzed in the study

| Clinical diagnosis                                                                                                                           | ICD-10 (International Classification of Diseases) codes |       |        |       |       |       |
|----------------------------------------------------------------------------------------------------------------------------------------------|---------------------------------------------------------|-------|--------|-------|-------|-------|
| AF                                                                                                                                           | I48                                                     |       |        |       |       |       |
| Severe bleeding (intracranial, gastrointestinal, respiratory, renal/urinary tract, ocular, retroperitoneal or pericardial bleeding episodes) | D50.0                                                   | R04.0 | R31.0  | R31.9 | I71.3 | J94.2 |
|                                                                                                                                              | H05.2                                                   | H21.0 | H31.3  | H31.4 | H35.6 |       |
|                                                                                                                                              | H43.1                                                   | H44.8 | H47.0  | R58   | M25.0 |       |
|                                                                                                                                              | M79.8                                                   | N83.7 | N89.7  | N92.0 | N92.1 |       |
|                                                                                                                                              | N92.5                                                   | N93.0 | N93.8  | N93.9 | O71.7 |       |
|                                                                                                                                              | R04.1                                                   | R04.2 | R04.89 | R04.9 |       |       |
|                                                                                                                                              | D62                                                     | D68.3 | D69.8  | D69.9 | H11.3 |       |
|                                                                                                                                              | H45.0                                                   | H92.2 | I23.0  | I31.2 | S26.0 | S27.1 |
|                                                                                                                                              | T79.2                                                   | N02   | R31    | N42.1 | N92.4 | T81.0 |
|                                                                                                                                              | Y60                                                     | R58   | R04    | N02.0 | N02.1 |       |
|                                                                                                                                              | N02.2                                                   | N02.3 | N02.4  | N02.5 | N02.6 |       |
|                                                                                                                                              | N02.7                                                   | N02.8 | N02.9  | N42.1 | N92.3 |       |
|                                                                                                                                              | N95.0                                                   | R04.8 | N93    | N85.7 | R23.3 | I85.0 |
|                                                                                                                                              | K22.1                                                   | K25.4 | K26.4  | K27.0 | K29.0 |       |
|                                                                                                                                              | K29.7                                                   | K31.8 | K92.0  | K57.3 | K57.9 |       |
|                                                                                                                                              | K62.5                                                   | K92.1 | K92.2  | K25.0 | K25.2 |       |
|                                                                                                                                              | K25.6                                                   | K26.0 | K26.2  | K26.6 | K27.2 |       |
|                                                                                                                                              | K27.4                                                   | K27.6 | K28.0  | K28.2 | K28.4 |       |
|                                                                                                                                              | K28.6                                                   | K29.2 | K29.3  | K29.4 | K29.5 |       |
|                                                                                                                                              | K29.6                                                   | K29.8 | K55.2  | K57.0 | K57.1 |       |
|                                                                                                                                              | K57.2                                                   | K57.4 | K57.5  | K57.8 | I98.3 |       |
|                                                                                                                                              | K22.6                                                   | K66.1 | K76.2  | K62.6 | K63.3 | I84.4 |
|                                                                                                                                              | I62.0                                                   | I62.9 | I60    | I60.0 | I60.1 | I60.2 |
|                                                                                                                                              | I60.3                                                   | I60.4 | I60.5  | I60.6 | I60.7 | I60.8 |
|                                                                                                                                              | I60.9                                                   | I61   | I61.0  | I61.1 | I61.2 | I61.3 |
|                                                                                                                                              | I61.4                                                   | I61.5 | I61.6  | I61.8 | I61.9 | I62.1 |
|                                                                                                                                              | I62                                                     | S06.4 | S06.5  | S06.6 |       |       |
| Alcohol consumption (alcohol-related medical services)                                                                                       | I42.6                                                   | F10   | F10.0  | F10.1 | F10.2 | F10.3 |
|                                                                                                                                              | F10.7                                                   | F10.8 | F10.9  | F10.3 | F10.4 | F10.5 |
|                                                                                                                                              | F10.6                                                   | F10.7 | F10.8  | F10.9 | F15.7 |       |
|                                                                                                                                              | G31.2                                                   | G62.1 | G72.1  | I42.6 | K29.2 | K70   |
|                                                                                                                                              | K70.0                                                   | K70.1 | K70.2  | K70.3 | K70.4 |       |
|                                                                                                                                              | K70.9                                                   | K86.0 | T51    |       |       |       |
| CKD (chronic glomerulonephritis, chronic tubulointerstitial nephropathy, diabetic, and hypertensive nephropathy)                             | N99.0                                                   | I12.0 | N03.6  | N18   | N18.0 |       |
|                                                                                                                                              | N18.8                                                   | N18.9 | G63.8  | I32.8 | N18   | N19   |
| Liver disease (chronic liver disease, liver cirrhosis, hepatitis)                                                                            | K70                                                     | K70.9 | K71.0  | K71.1 | K71.2 |       |
|                                                                                                                                              | K71.3                                                   | K71.4 | K71.5  | K71.6 | K71.7 |       |
|                                                                                                                                              | K71.8                                                   | K71.9 | K75.9  | K76.5 | K76.9 |       |
|                                                                                                                                              | K77.0                                                   | K70.4 | K71.1  | K72   | K72.1 |       |
|                                                                                                                                              | K72.9                                                   | K70.2 | K71.7  | K74   | K74.0 |       |
|                                                                                                                                              | K74.2                                                   |       |        |       |       |       |
| HF (including cardiomyopathies)                                                                                                              | I50                                                     | I50.0 | I50.1  | I50.9 | I42.0 | I25.5 |
|                                                                                                                                              | I42                                                     | I42.4 | I42.9  | O90.3 | I42.0 | I42.1 |
|                                                                                                                                              | I42.2                                                   | I42.3 | I42.6  | I42.7 | I42.8 | I42.9 |
|                                                                                                                                              | I43.8                                                   | I13.0 | I13.2  | I43   | I43.0 | I43.1 |
| Hypertension                                                                                                                                 | I10                                                     | I11   | I11.0  | I11.9 | I15   | I15.0 |
|                                                                                                                                              | I15.1                                                   | I15.2 | I15.8  | I15.9 | O11   |       |
| Diabetes and prediabetic conditions                                                                                                          | E10                                                     | E11   | N08.3  | E10.0 | E10.1 | E10.2 |
|                                                                                                                                              | E10.3                                                   | E10.3 | E10.4  | E10.5 | E10.6 | E10.7 |
|                                                                                                                                              | E10.8                                                   | E10.9 | E10.0  | E11.1 | E11.2 | E11.3 |
|                                                                                                                                              | E11.3                                                   | E11.4 | E11.5  | E11.6 | E11.7 | E11.8 |

|                                                                                                         |                                                                                                               |                                                                                                             |                                                                                                                 |                                                                                                                   |                                                                                                      |                                                                                      |
|---------------------------------------------------------------------------------------------------------|---------------------------------------------------------------------------------------------------------------|-------------------------------------------------------------------------------------------------------------|-----------------------------------------------------------------------------------------------------------------|-------------------------------------------------------------------------------------------------------------------|------------------------------------------------------------------------------------------------------|--------------------------------------------------------------------------------------|
|                                                                                                         | E11.9<br>E10.0<br>E10.6<br>E11.5<br>E12.4<br>E13.3<br>E14.2<br>G59.0<br>H36.0<br>R73.0                        | E13<br>E10.1<br>E11.0<br>E11.6<br>E12.5<br>E13.4<br>E14.3<br>G63.2<br>I79.2<br>T38.3                        | E14<br>E10.2<br>E11.1<br>E12.0<br>E12.6<br>E13.5<br>E14.4<br>G73.0<br>M14.2<br>Y42.3                            | E12<br>E10.3<br>E11.2<br>E12.1<br>E13.0<br>E13.6<br>E14.5<br>G99.0<br>M14.6<br>R40                                | E13<br>E10.4<br>E11.3<br>E12.2<br>E13.1<br>E14.0<br>E14.6<br>H28.0                                   | E14<br>E10.5<br>E11.4<br>E12.3<br>E13.2<br>E14.1<br>E15                              |
| Stroke/TIA/ other thromboembolic events                                                                 | I63<br>I63.5<br>I69.4<br>G45.9<br>I74.4<br>I63.1<br>I63.5<br>I65.9<br>I65<br>H34.1<br>I63.3<br>I67.9<br>I74.4 | I63.0<br>I63.6<br>G45<br>I74<br>I74.5<br>I63.2<br>I66.9<br>N28.0<br>K55.0<br>G45.8<br>I63.4<br>I64<br>I74.5 | I63.1<br>I63.8<br>G45.3<br>I74.0<br>I74.8<br>I65.1<br>K55.0<br>I65.0<br>I74<br>G45.9<br>I63.5<br>I74.0<br>I74.8 | I63.2<br>I63.9<br>G45.4<br>I74.1<br>I74.9<br>I65.2<br>I63.0<br>K55.0<br>M31.1<br>I63.0<br>I63.8<br>I74.1<br>I74.9 | I63.3<br>I64<br>G45.6<br>I74.2<br>I63.0<br>I63.3<br>I63.1<br>I63<br>N28.0<br>I63.1<br>I63.9<br>I74.2 | I63.4<br>I69.3<br>I74.3<br>I63.0<br>I63.4<br>I63.2<br>G45<br>I63.2<br>I67.8<br>I74.3 |
| Atherosclerosis (myocardial infarction, peripheral artery disease and other atherosclerotic conditions) | I70<br>I67.2<br>I21<br>I21.4<br>I20.1<br>I25.5<br>I70.1<br>I70.9                                              | I70.0<br>I25.1<br>I21.0<br>I21.9<br>I25<br>I25.0<br>I70.2<br>I70.1                                          | I70.1<br>K55.1<br>I21.0<br>I20<br>I25.0<br>I25.1<br>I70.8<br>I70.2                                              | I70.2<br>I27.0<br>I21.1<br>I20.0<br>I25.1<br>I67.2<br>I70.9<br>I70.8                                              | I70.8<br>Z95.1<br>I21.2<br>I20.8<br>I25.2<br>I70<br>I70.2<br>I70.9                                   | I70.9<br>Z95.5<br>I21.3<br>I20.9<br>I25.6<br>I70.0<br>I70.8                          |
| CAD                                                                                                     | Z95.1<br>I21.2<br>I20.8<br>I25.2                                                                              | Z95.5<br>I21.3<br>I20.9<br>I25.6                                                                            | I21<br>I21.4<br>I20.1<br>I25.5                                                                                  | I21.0<br>I21.9<br>I25<br>I25.0                                                                                    | I21.0<br>I20<br>I25.0                                                                                | I21.1<br>I20.0<br>I25.1                                                              |
| COPD                                                                                                    | J44.0                                                                                                         | J44.1                                                                                                       | J44.8                                                                                                           | J44.9                                                                                                             | J44                                                                                                  |                                                                                      |
| Smoking history                                                                                         | F17.2<br>F17.3<br>F17.9                                                                                       | T65.2<br>F17.4<br>Z71.6                                                                                     | F17<br>F17.5<br>Z72.0                                                                                           | F17.0<br>F17.6<br>Z58.7                                                                                           | F17.1<br>F17.7                                                                                       | F17.2<br>F17.8                                                                       |

AF- Atrial Fibrillation; CKD- chronic kidney disease; HF- heart failure; TIA- transient ischemic attack; CAD- coronary artery disease; COPD- chronic obstructive pulmonary disease.

Supplementary Table S2. Confusion matrix for HASBLED score

| -   | NHF |     |     |     |    |    |     |    |
|-----|-----|-----|-----|-----|----|----|-----|----|
| IHR | -   | 0   | 1   | 2   | 3  | 4  | 5   | 6  |
| 0   |     | 834 | 145 | 18  | 1  | 82 | 8   | 0  |
| 1   |     | 57  | 879 | 334 | 70 | 17 | 117 | 19 |
| 2   |     | 4   | 156 | 181 | 59 | 9  | 34  | 13 |
| 3   |     | 1   | 19  | 26  | 17 | 6  | 4   | 3  |
| 4   |     | 0   | 5   | 2   | 1  | 1  | 1   | 0  |
| 5   |     | 0   | 0   | 0   | 0  | 0  | 0   | 0  |
| 6   |     | 0   | 0   | 0   | 0  | 0  | 0   | 0  |

Supplementary Table S3. Confusion matrix for HASBLED score according to  $\geq 3$  points cutoff - high risk of bleeding according to 2020 ESC AF guidelines

|     |     |          |     |
|-----|-----|----------|-----|
| -   | NHF | <3       | >=3 |
| IHR | -   |          |     |
| <3  |     | 260<br>8 | 429 |
| >=3 |     | 53       | 33  |

Supplementary Table S4. Confusion matrix for CHA2DS2VASc score

|     |     |    |     |     |     |     |     |     |    |    |   |
|-----|-----|----|-----|-----|-----|-----|-----|-----|----|----|---|
| -   | NHF | 0  | 1   | 2   | 3   | 4   | 5   | 6   | 7  | 8  | 9 |
| IHR | -   |    |     |     |     |     |     |     |    |    |   |
| 0   |     | 69 | 73  | 49  | 14  | 2   | 18  | 0   | 0  | 0  | 0 |
| 1   |     | 35 | 146 | 148 | 95  | 27  | 37  | 10  | 0  | 0  | 0 |
| 2   |     | 13 | 55  | 136 | 166 | 91  | 39  | 30  | 6  | 0  | 0 |
| 3   |     | 4  | 14  | 41  | 127 | 168 | 99  | 39  | 30 | 0  | 0 |
| 4   |     | 1  | 8   | 17  | 42  | 168 | 178 | 111 | 54 | 9  | 0 |
| 5   |     | 0  | 2   | 15  | 25  | 59  | 146 | 151 | 76 | 20 | 0 |
| 6   |     | 0  | 1   | 6   | 9   | 13  | 48  | 119 | 91 | 36 | 0 |
| 7   |     | 0  | 0   | 0   | 7   | 3   | 8   | 21  | 53 | 19 | 0 |
| 8   |     | 0  | 0   | 0   | 2   | 0   | 1   | 0   | 5  | 10 | 0 |
| 9   |     | 0  | 0   | 0   | 0   | 0   | 0   | 0   | 0  | 0  | 0 |

Supplementary Table S5. Confusion matrix for CHA2DS2VASc score according to >=2 points for men and >= 3 points for woman cutoff– class I recommendation for chronic anticoagulation in atrial fibrillation according to 2020 ESC AF guidelines

|                                     |     |     |     |      |
|-------------------------------------|-----|-----|-----|------|
| Chronic anticoagulation recommended | -   | NHF | No  | Yes  |
|                                     | IHR | -   |     |      |
|                                     | No  |     | 410 | 516  |
|                                     | Yes |     | 107 | 2282 |
